# Supplementary material for: Hyperglycemia Suppresses Calcium Phosphate–Induced Aneurysm Formation Through Inhibition of Macrophage Activation
Source: PubMed Central journal article supplement — J Am Heart Assoc. 2016 Mar 28;5(3):e003062. doi: 10.1161/JAHA.115.003062 (PMC4943277; doi:10.1161/jaha.115.003062), 2016-03-28
Supplement: JAH3-5-e003062-s001.pdf [file JAH3-5-e003062-s001.pdf]

SUPPLEMENTAL MATERIAL

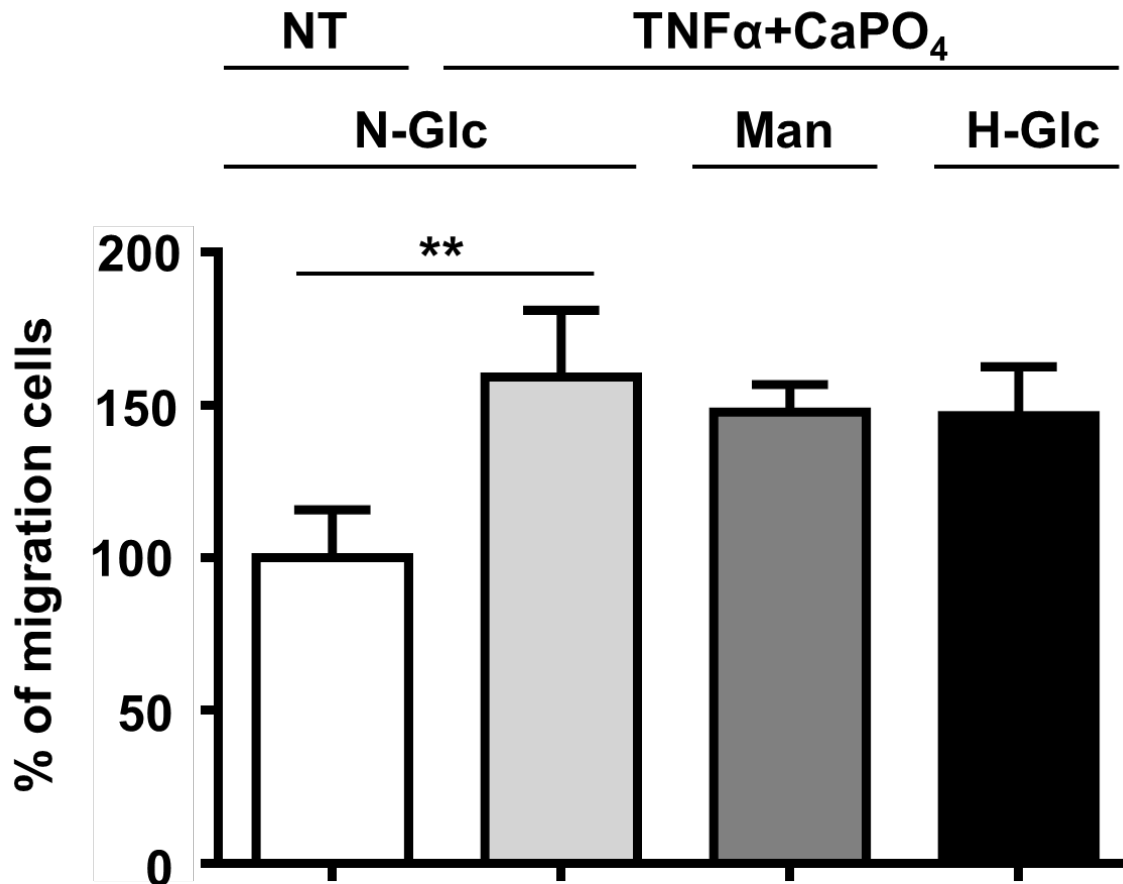

**Figure S1. Effect of high-glucose treatment on cell migration**

RAW264.7 cells ( $4 \times 10^3$  cells) were incubated for 6h under normoglycemic conditions (N-Glc, 5.5 mM glucose) without TNF $\alpha$ +CaPO $_4$  (no treatment [NT] control), N-Glc with TNF $\alpha$ +CaPO $_4$ , normoglycemic conditions with high osmotic pressure (Man, 5.5 mM glucose and 10.5 mM mannitol) and TNF $\alpha$ +CaPO $_4$ , and hyperglycemic conditions (H-Glc, 15.5 mM glucose) with TNF $\alpha$ +CaPO $_4$  with a Cell migration BioGel assay (Enzo Life Science, Farmingdale, NY, USA) according the manufacture's instruction.

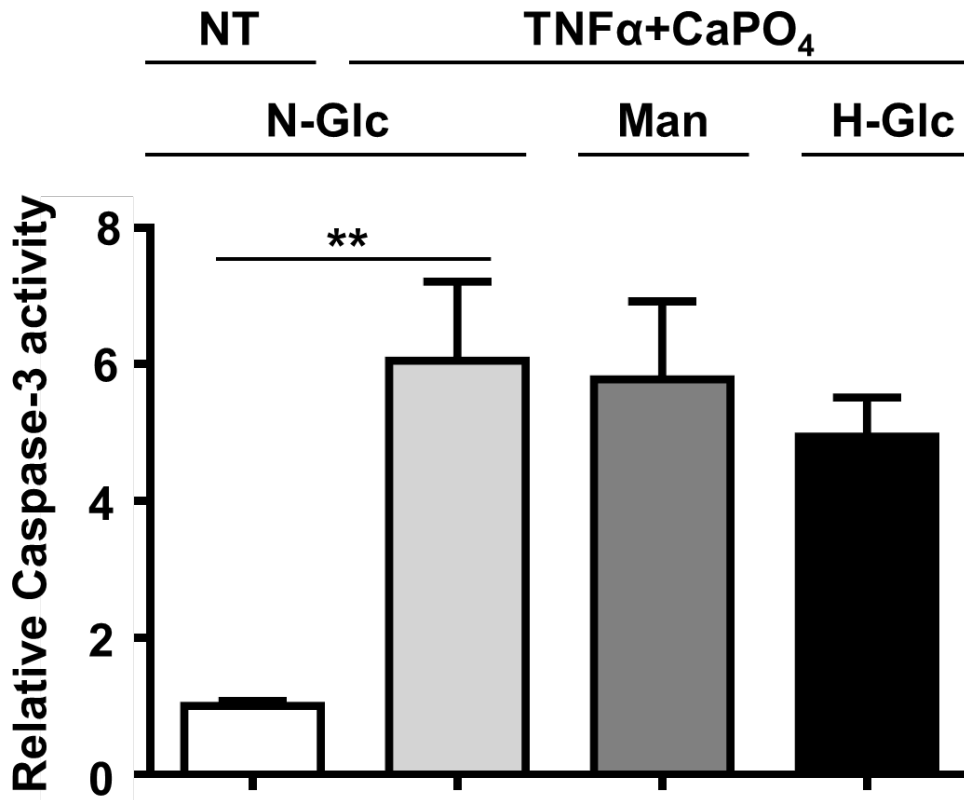

**Figure S2. Effect of high-glucose treatment on caspase-3 activity on smooth muscle cells**

MOVAS (murine smooth muscle cell) were incubated for 48h under normoglycemic conditions (N-Glc, 5.5 mM glucose) without  $\text{TNF}\alpha+\text{CaPO}_4$  (no treatment [NT] control), N-Glc with  $\text{TNF}\alpha+\text{CaPO}_4$ , normoglycemic conditions with high osmotic pressure (Man, 5.5 mM glucose and 10.5 mM mannitol) and  $\text{TNF}\alpha+\text{CaPO}_4$ , and hyperglycemic conditions (H-Glc, 15.5 mM glucose) with  $\text{TNF}\alpha+\text{CaPO}_4$ . And then caspase-3 activity was measured in cell lysates using an ApoAlert caspase colorimetric assay kit (Clontech, Mountain View, CA, USA).
